# Supplementary material for: The PROFOUND database for evaluating vegetation models and simulating climate impacts on forests
Source: Copernicus journal article supplement (doi:10.5194/essd-2019-220), 2019-11-29
Supplement: Supplementary file 1 [file essd-2019-220-supplement.pdf]

# Supporting Online Material for **The PROFOUND database for evaluating vegetation models and simulating climate impacts on forests**

Christopher P.O. Reyer<sup>1</sup>, Ramiro Silveyra Gonzalez<sup>1</sup>, Klara Dolos<sup>3</sup>, Florian Hartig<sup>4</sup>, Ylva Hauf<sup>1</sup>, Matthias Noack<sup>5</sup>, Petra Lasch-Born<sup>1</sup>, Thomas Rötzer<sup>6</sup>, Hans Pretzsch<sup>6</sup>, Henning Meesenburg<sup>7</sup>, Stefan Fleck<sup>7</sup>, Markus Wagner<sup>7</sup>, Andreas Bolte<sup>8</sup>, Tanja GM Sanders<sup>8</sup>, Pasi Kolari<sup>9</sup>, Annikki Mäkelä<sup>9</sup>, Timo Vesala<sup>9</sup>, Ivan Mammarella<sup>9</sup>, Jukka Pumpanen<sup>10</sup>, Alessio Collalti<sup>11, 12</sup>, Carlo Trotta<sup>12</sup>, Giorgio Matteucci<sup>13</sup>, Ettore D'Andrea<sup>13</sup>, Lenka Foltýnová<sup>14</sup>, Jan Krejza<sup>14</sup>, Andreas Ibrom<sup>15</sup>, Kim Pilegaard<sup>15</sup>, Denis Loustau<sup>16</sup>, Jean-Marc Bonnefond<sup>16</sup>, Paul Berbigier<sup>16</sup>, Delphine Picart<sup>16</sup>, Sébastien Lafont<sup>16</sup>, Michael Dietze<sup>17</sup>, David Cameron<sup>18</sup>, Massimo Vieno<sup>19</sup>, Hanqin Tian<sup>20</sup>, Alicia Palacios-Orueta<sup>21</sup>, Victor Cicuendez<sup>21</sup>, Laura Recuero<sup>21</sup>, Klaus Wiese<sup>21</sup>, Matthias Büchner<sup>1</sup>, Stefan Lange<sup>1</sup>, Jan Volkholz<sup>1</sup>, Hyungjun Kim<sup>22</sup>, Graham P. Weedon<sup>27</sup>, Justin Sheffield<sup>28</sup>, Iliusi Vega del Valle<sup>1</sup>, Felicitas Suckow<sup>1</sup>, Joanna A. Horemans<sup>23</sup>, Simon Martel<sup>16</sup>, Friedrich Bohn<sup>24</sup>, Jörg Steinkamp<sup>25</sup>, Alexander Chikalanov<sup>26</sup>, Mats Mahnken<sup>1</sup>, Martin Gutsch<sup>1</sup>, Katja Frieler<sup>1</sup>

<sup>1</sup>Potsdam Institute for Climate Impact Research, Member of the Leibniz Association, P.O. Box 601203, D-14412 Potsdam, Germany

<sup>2</sup>University of Freiburg, Freiburg, Germany

<sup>3</sup>Karlsruhe Institute of Technology (KIT), Karlsruhe, Germany

<sup>4</sup>University of Regensburg, Regensburg, Germany

<sup>5</sup>Fachagentur Nachwachsende Rohstoffe e.V. (FNR), Gülzow-Prüzen, Germany

<sup>6</sup>Technical University of Munich, Munich, Germany

<sup>7</sup>Northwest German Forest Research Institute, Göttingen, Germany

<sup>8</sup>Thünen Institute of Forest Ecosystems, 16225 Eberswalde, Germany

<sup>9</sup>University of Helsinki, Helsinki, Finland

<sup>10</sup>University of Eastern Finland, Kuopio, Finland

<sup>11</sup>National Research Council of Italy, Institute for Agriculture and Forestry Systems in the Mediterranean, Rende (CS), Italy

<sup>12</sup>Department of Innovation in Biological, Agro-food and Forest System, University of Tuscia, 01100 Viterbo, Italy

<sup>13</sup>National Research Council of Italy, Institute for Agriculture and Forestry System in the Mediterranean, Ercolano (NA), Italy

<sup>14</sup>Global Change Research Institute, Brno, Czech Republic

<sup>15</sup>Technical University of Denmark, Lyngby, Denmark

<sup>16</sup>French National Institute for Agricultural Research, Bordeaux, France

<sup>17</sup>Boston University, Boston, USA

<sup>18</sup>Centre for Ecology and Hydrology, Lancaster, United Kingdom

<sup>19</sup>Centre for Ecology and Hydrology, Edinburgh, United Kingdom

<sup>20</sup>Auburn University, Auburn, United States

<sup>21</sup>Technical University of Madrid, Madrid, Spain

<sup>22</sup>University of Tokyo, Tokyo, Japan

<sup>23</sup>Centre of Excellence PLECO, University of Antwerpen, Antwerpen, Belgium

<sup>24</sup>Helmholtz Center for Environmental Research, Leipzig, Germany

<sup>25</sup>Senckenberg Biodiversity and Climate Research Centre, Senckenberg, Germany

<sup>26</sup>University of Library Study and Information Technology, Sofia, Bulgaria

<sup>27</sup>Met Office, Wallingford, UK

<sup>28</sup>Princeton University, Dept. Civil & Environ. Eng., Princeton, NJ 08544, USA

Correspondence to: Christopher P.O. Reyer ([reyer@pik-potsdam.de](mailto:reyer@pik-potsdam.de))

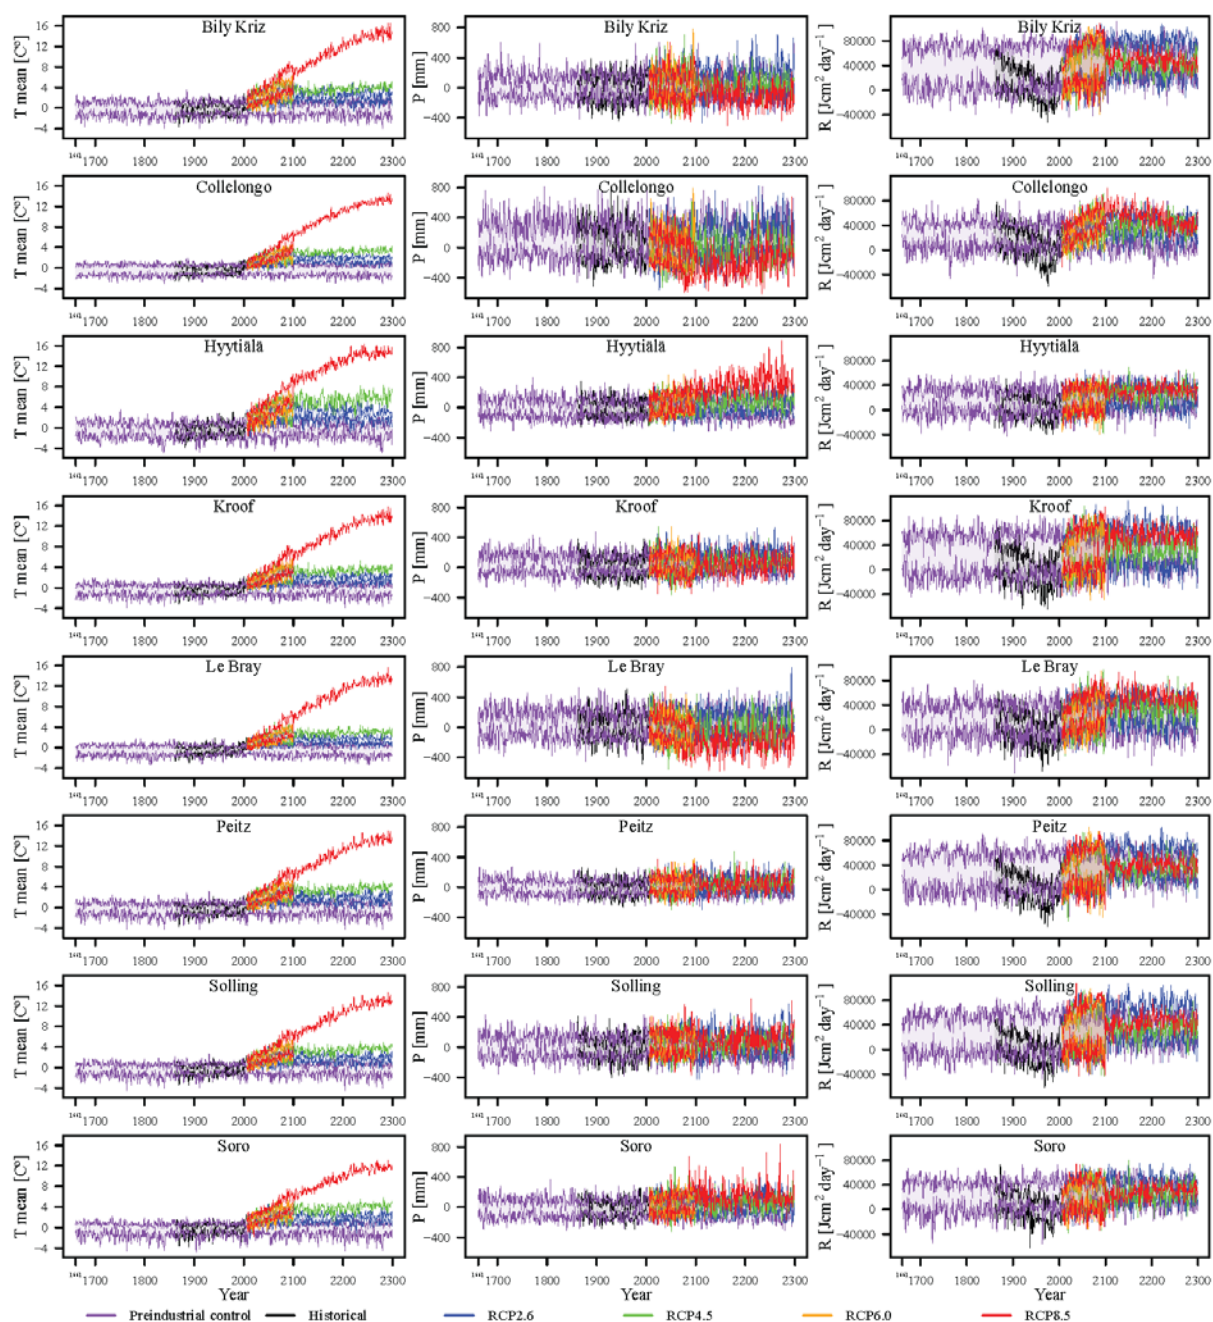

**Figure SOM1:** Change in mean annual temperature (T mean), annual precipitation sum (P) and annual sum of global radiation (R) over the time period 1661-2299 relative to the 1980-2005 average for the ISIMIP2b scenarios. Please note that the two Solling sites have the same climate.

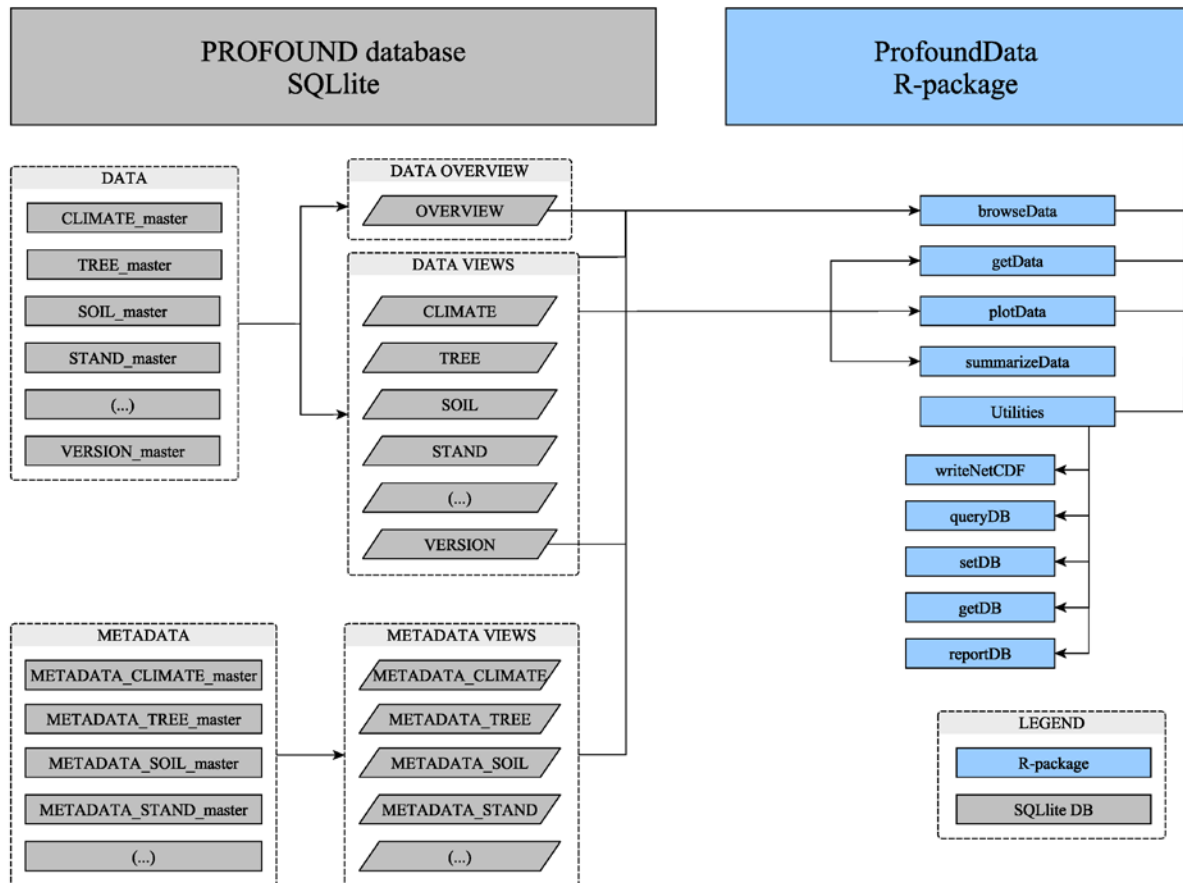

**Figure SOM2:** The main structure and links between the PROFOUND DB (grey) and the PROFOUNDData R-package (blue).

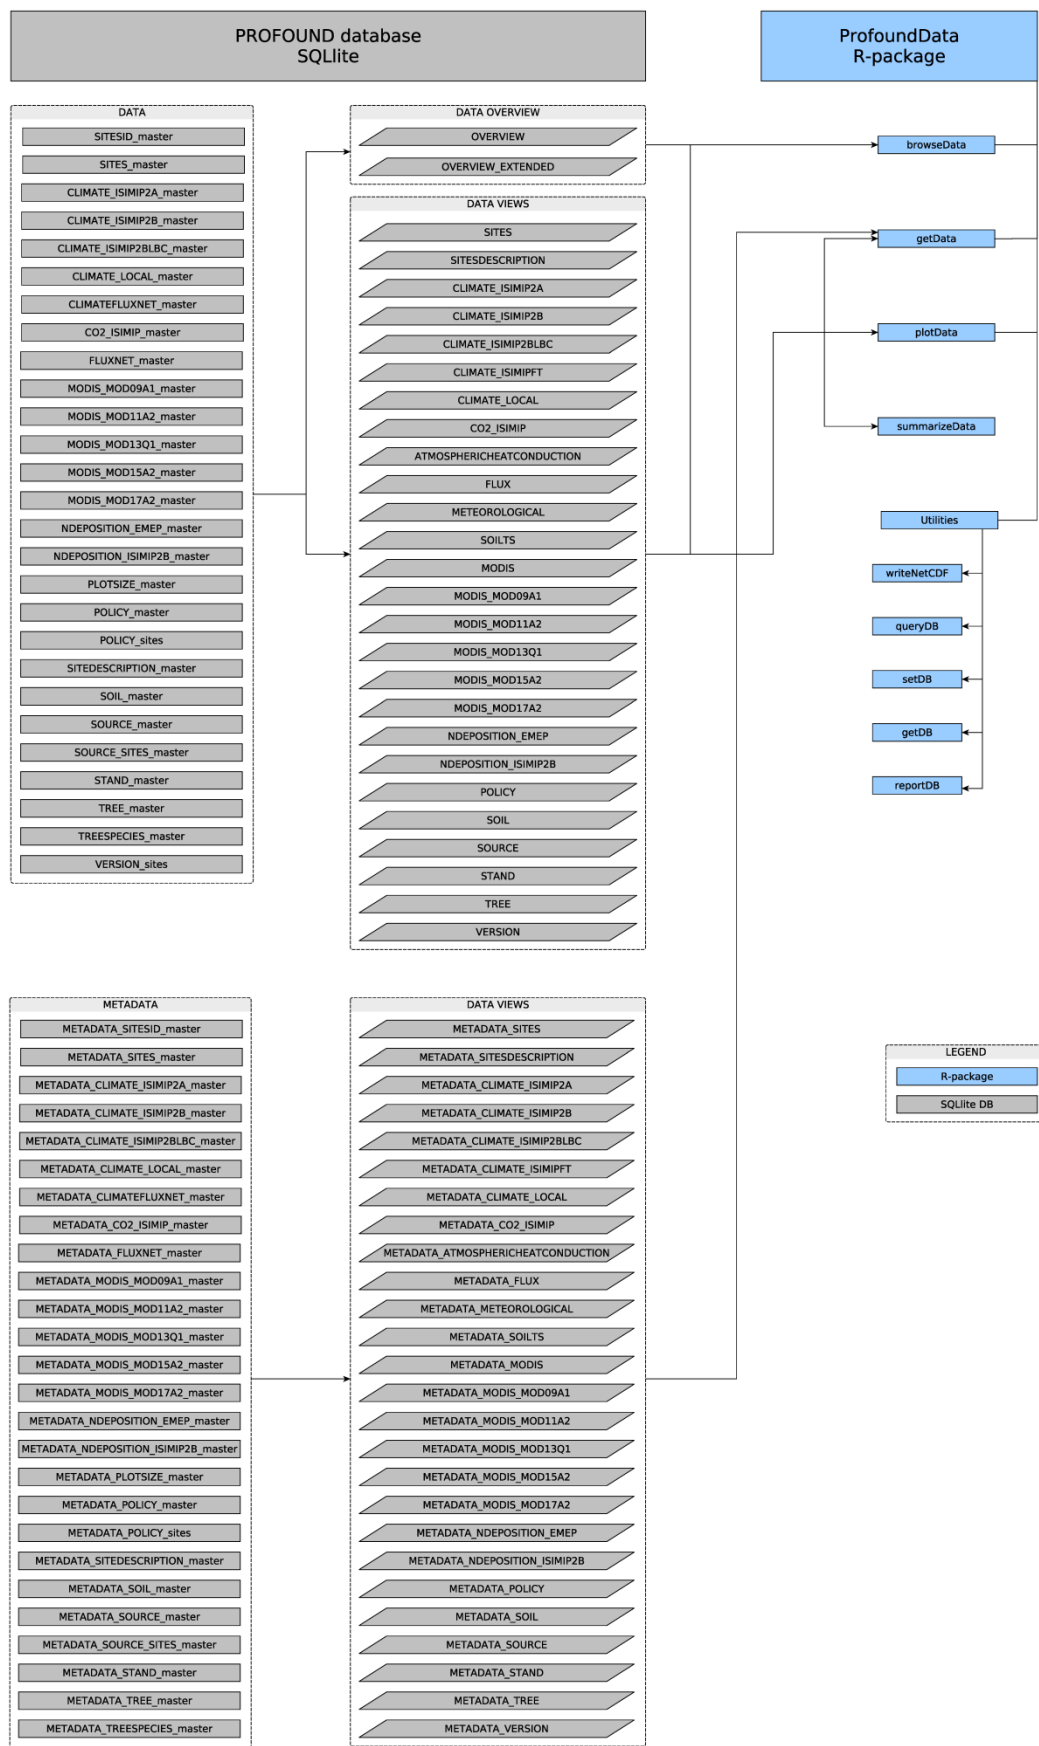

**Figure SOM3:** The full structure and links between the PROFOUND DB (grey) and the PROFOUNDData R-package (blue).

**Table SOM1:** Description of SITES variables included in the database.

| variable                  | type    | units          | description                                                                                                                                                                                                                                                                     |
|---------------------------|---------|----------------|---------------------------------------------------------------------------------------------------------------------------------------------------------------------------------------------------------------------------------------------------------------------------------|
| site                      | TEXT    | adimensional   | Site name                                                                                                                                                                                                                                                                       |
| site_id                   | INTEGER | adimensional   | Site code as decimal number (01-99)                                                                                                                                                                                                                                             |
| aspect_deg                | REAL    | degree         | Direction of slope inclination. Degrees against North. No Value indicates no exposition.                                                                                                                                                                                        |
| country                   | TEXT    | adimensional   | Country                                                                                                                                                                                                                                                                         |
| elevation_masl            | REAL    | m              | Elevation above sea level as recorded by PI                                                                                                                                                                                                                                     |
| epsg                      | INTEGER | adimensional   | EPSG Coordinate System                                                                                                                                                                                                                                                          |
| lat                       | REAL    | degree decimal | Latitude                                                                                                                                                                                                                                                                        |
| lon                       | REAL    | degree decimal | Longitude                                                                                                                                                                                                                                                                       |
| natVegetation_code1       | TEXT    | adimensional   | Code of the vegetation mapping unit group in the "Map of the Natural Vegetation of Europe". BOHN, U.; GOLLUB, G. & HETTWER, C. (2000) Karte der natuerlichen Vegetation Europas. Massstab 1:2.500.000 Karten und Legende. Teil 1-3.. Bundesamt fuer Naturschutz, Bonn, Germany. |
| natVegetation_code2       | TEXT    | adimensional   | Code of the vegetation mapping unit in the "Map of the Natural Vegetation of Europe". BOHN, U.; GOLLUB, G. & HETTWER, C. (2000) Karte der natuerlichen Vegetation Europas. Massstab 1:2.500.000 Karten und Legende. Teil 1-3.. Bundesamt fuer Naturschutz, Bonn, Germany.       |
| natVegetation_description | TEXT    | adimensional   | Description of natVegetation_code2. BOHN, U.; GOLLUB, G. & HETTWER, C. (2000) Karte der natuerlichen Vegetation Europas. Massstab 1:2.500.000 Karten und Legende. Teil 1-3.. Bundesamt fuer Naturschutz, Bonn, Germany.                                                         |
| slope_percent             | REAL    | percent        | Mean slope within the plot                                                                                                                                                                                                                                                      |

**Table SOM2:** Description of SOIL variables included in the database.

| variable          | type    | units        | description                                                                                                              |
|-------------------|---------|--------------|--------------------------------------------------------------------------------------------------------------------------|
| record_id         | INTEGER | adimensional | Record ID as decimal number                                                                                              |
| site              | TEXT    | adimensional | Site name                                                                                                                |
| site_id           | INTEGER | adimensional | Site code as decimal number (1-99)                                                                                       |
| date              | TEXT    | adimensional | Unformatted date of inventory as provided for the inventory. See site specific metadata for further information on date. |
| bs_percent        | REAL    | percent      | Percentage of alkaline and earth alkaline metals at CEC                                                                  |
| cMax_percent      | REAL    | percent      | Maximum soil carbon content                                                                                              |
| cMin_percent      | REAL    | percent      | Minimum soil carbon content                                                                                              |
| cOrgSigma_percent | REAL    | percent      | Soil organic carbon content error estimate as standard deviation                                                         |
| cOrg_gcm3         | REAL    | g cm-3       | Soil organic carbon content                                                                                              |
| cOrg_percent      | REAL    | percent      | Soil organic carbon content                                                                                              |
| cSigma_kgm2       | REAL    | kg m-2       | Soil carbon content error estimate as standard deviation                                                                 |
| c_kgm2            | REAL    | kg m-2       | Soil carbon content                                                                                                      |
| c_percent         | REAL    | percent      | Soil carbon content                                                                                                      |
| cec_μeqg          | REAL    | μeq g-1      | Soil cation exchange capacity                                                                                            |
| claySigma_percent | REAL    | percent      | Soil clay particle content error estimate as standard deviation                                                          |
| clay_percent      | REAL    | percent      | Soil clay particle content                                                                                               |
| cn                | REAL    | adimensional | Soil C:N ratio                                                                                                           |
| densitySigma_gcm3 | REAL    | g cm-3       | Soil bulk density content error estimate as standard deviation                                                           |

|                   |             |                      |                                                                      |
|-------------------|-------------|----------------------|----------------------------------------------------------------------|
| density_gcm3      | REAL        | g cm-3               | Soil bulk density                                                    |
| fcapv_percent     | REAL        | percent              | Soil field capacity                                                  |
| fineRoot_percent  | REAL        | percent              | Distribution of fine roots accross soil horizons                     |
| gravel_percent    | REAL        | percent              | Soil gravel particle content                                         |
| horizon           | TEXT        | adimensional         | Name of soil horizon                                                 |
| humus_tCha        | REAL        | tC ha-1              | Humus carbon content                                                 |
| hydCondSat_cmd1   | REAL        | cm d-1               | Soil hydraulic conductivity at saturation                            |
| layer_id          | INTEGE<br>R | adimensional         | Layer code as decimal number (1-99)                                  |
| lowerDepth_cm     | REAL        | cm                   | Lower soil horizon limit                                             |
| mbCSigma_mgg      | REAL        | mg C g-1 dry<br>soil | Soil microbial biomass carbon error estimate as standard deviation   |
| mbC_mgg           | REAL        | mg C g-1 dry<br>soil | Soil microbial biomass carbon                                        |
| mbNSigma_mgNg     | REAL        | mg N g-1 dry<br>soil | Soil microbial biomass nitrogen error estimate as standard deviation |
| mbN_mgNg          | REAL        | mg N g-1 dry<br>soil | Soil microbial biomass nitrogen                                      |
| minRSigma_mgkgh   | REAL        | mg N kg-1 h-1        | Soil mineralisation rate error estimate as standard deviation        |
| minR_mgkgh        | REAL        | mg N kg-1 h-1        | Soil mineralisation rate                                             |
| nMax_percent      | REAL        | percent              | Maximum soil nitrogen content                                        |
| nMin_percent      | REAL        | percent              | Minimum soil nitrogen content                                        |
| nOrgSigma_percent | REAL        | percent              | Soil organic nitrogen content error estimate as standard deviation   |
| nOrg_percent      | REAL        | percent              | Soil organic nitrogen content                                        |

|                   |         |              |                                                                                                                                 |
|-------------------|---------|--------------|---------------------------------------------------------------------------------------------------------------------------------|
| n_kgm2            | REAL    | kg m-2       | Soil nitrogen content                                                                                                           |
| n_percent         | REAL    | percent      | Soil nitrogen content                                                                                                           |
| ofhC_percent      | REAL    | percent      | The organic fermentative-humic (Ofh) subhorizon consists of forest litter (leaves, bark, twigs etc) showing considerable decay. |
| ofhN_percent      | REAL    | percent      | Carbon content in a gram of OFH sample                                                                                          |
| ofh_gDWm2         | REAL    | g DW m-2     | Litter layer (leaves not decomposed)                                                                                            |
| ol_gDWm2          | REAL    | g DW m-2     | Nitrogen content in a gram of OFH sample                                                                                        |
| phSigma_h2o       | REAL    | adimensional | Soil pH determined with H2O error estimate as standard deviation                                                                |
| phSigma_kcl       | REAL    | adimensional | Soil pH determined by KCl error estimate as standard deviation                                                                  |
| ph_cacl2          | REAL    | adimensional | Soil pH determined with CaCl2                                                                                                   |
| ph_h2o            | REAL    | adimensional | Soil pH determined with H2O                                                                                                     |
| ph_kcl            | REAL    | adimensional | Soil pH deterimed with KCl                                                                                                      |
| porosity_percent  | REAL    | percent      | Soil water content at saturation in the bulk soil                                                                               |
| rainGroundWater   | REAL    | adimensional | Whether the soil is mostly influenced by rain or ground water                                                                   |
| sandSigma_percent | REAL    | percent      | Soil sand particle content error estimate as standard deviation                                                                 |
| sand_percent      | REAL    | percent      | Soil sand particle content                                                                                                      |
| siltSigma_percent | REAL    | percent      | Soil silt particle content error estimate as standard deviation                                                                 |
| silt_percent      | REAL    | percent      | Soil silt particle content                                                                                                      |
| table_id          | INTEGER | adimensional | Table code as decimal number (1-99)                                                                                             |
| texture           | TEXT    | adimensional | Soil texture                                                                                                                    |
| thicknesSigma_cm  | REAL    | cm           | Soil thickness error estimate                                                                                                   |
| thickness_cm      | REAL    | cm           | Soil thickness                                                                                                                  |



|               |      |              |                                                                                                                                   |
|---------------|------|--------------|-----------------------------------------------------------------------------------------------------------------------------------|
| type_fao      | TEXT | adimensional | Soil type after ISSS-ISRIC-FAO (1998) World reference basis for soil resources. World Soil Resources Reports 84. FAO, Rome. 92 p. |
| type_ka5      | TEXT | adimensional | Soil type after AG Boden (2005) Bodenkundliche Kartieranleitung. Bundesanstalt für Geowissenschaften und Rohstoffe, Hannover      |
| upperDepth_cm | REAL | cm           | Upper soil horizon limit                                                                                                          |
| whcSigma_mm   | REAL | mm           | Soil water holding capacity error estimate                                                                                        |
| whc_mm        | REAL | mm           | Soil water holding capacity                                                                                                       |
| whcp_percent  | REAL | percent      | Water holding capacity for plant available water                                                                                  |
| wiltp_percent | REAL | percent      | Soil wilting point                                                                                                                |

**Table SOM3:** Description of CLIMATE variables included in the database.

| variable       | type    | units          | description                                     |
|----------------|---------|----------------|-------------------------------------------------|
| record_id      | INTEGER | adimensional   | Record ID as decimal number                     |
| site           | TEXT    | adimensional   | Site name                                       |
| site_id        | INTEGER | adimensional   | Site code as decimal number (01-99)             |
| date           | TEXT    | adimensional   | Date in format YYYY-MM-DD                       |
| year           | INTEGER | YYYY           | Year with century as decimal number (0000-9999) |
| mo             | INTEGER | MM             | Month as decimal number (01-12)                 |
| day            | INTEGER | DD             | Day of the month as decimal number (01-31)      |
| airpress_hPa   | REAL    | hPa            | Mean daily air pressure                         |
| p_mm           | REAL    | mm             | Total daily precipitation                       |
| rad_Jcm2day    | REAL    | J cm-2         | Total daily global radiation                    |
| relhum_percent | REAL    | percent        | Mean daily relative humidity                    |
| tmax_degC      | REAL    | degree Celsius | Maximum daily temperature                       |
| tmean_degC     | REAL    | degree Celsius | Mean daily temperature                          |
| tmin_degC      | REAL    | degree Celsius | Minimum daily temperature                       |
| wind_ms        | REAL    | m s-1          | Mean daily wind speed                           |

**Table SOM4:** Description of CLIMATE\_ISIMIP additional variables included in the database.

| variable          | type | units        | description                                                                                                                                                                                           |
|-------------------|------|--------------|-------------------------------------------------------------------------------------------------------------------------------------------------------------------------------------------------------|
| site              | TEXT | adimensional | Site name                                                                                                                                                                                             |
| forcingConditions | TEXT | adimensional | This category refers to the conditions underlying the climatic forcing, e.g. following historical CO2 time series, preindustrial picontrol runs or representative concentration pathways (rcp).       |
| forcingDataset    | TEXT | adimensional | This category refers to data taken from bias-corrected general circulation models (e.g. hadgem) or historical global meteorological forcing data based on bias-corrected reanalysis data (e.g. watch) |

**Table SOM5:** Description of CO2\_ISIMIP variables included in the database.

| variable          | type    | units        | description                                                                                                                                                       |
|-------------------|---------|--------------|-------------------------------------------------------------------------------------------------------------------------------------------------------------------|
| record_id         | INTEGER | adimensional | Record ID as decimal number                                                                                                                                       |
| site              | TEXT    | adimensional | Site name                                                                                                                                                         |
| site_id           | INTEGER | adimensional | Site code as decimal number (01-99)                                                                                                                               |
| forcingConditions | TEXT    | adimensional | This category refers to the conditions underlying the climatic forcing, e.g. following historical CO2 time series or representative concentration pathways (rcp). |
| year              | INTEGER | YYYY         | Year with century as decimal number (0000-9999)                                                                                                                   |
| co2_ppm           | REAL    | ppm          | CO2 mean global concentrations for the different different forcing conditions: RCP and historical values (1975-2013)                                              |

**Table SOM6:** Description of NDEPOSITION and NDEPOSITION\_ISIMIP2B variables included in the database.

| variable          | type    | units        | description                                                                                                                                                                                     |
|-------------------|---------|--------------|-------------------------------------------------------------------------------------------------------------------------------------------------------------------------------------------------|
| record_id         | INTEGER | adimensional | Record ID as decimal number                                                                                                                                                                     |
| site              | TEXT    | adimensional | Name of the site                                                                                                                                                                                |
| site_id           | INTEGER | adimensional | Site code as decimal number (01-99)                                                                                                                                                             |
| year              | INTEGER | YYYY         | Year with century as decimal number (0000-9999)                                                                                                                                                 |
| nhx_gm2           | REAL    | g m-2        | Total deposition of reduced nitrogen (Dry+Wet RdN)                                                                                                                                              |
| noy_gm2           | REAL    | g m-2        | Total deposition of oxidized nitrogen (Dry+Wet oxN)                                                                                                                                             |
| forcingConditions | TEXT    | adimensional | This category refers to the conditions underlying the climatic forcing, e.g. following historical CO2 time series, preindustrial picontrol runs or representative concentration pathways (rcp). |

**Table SOM7:** Description of TREE variables included in the database.

| variable   | type    | units        | description                                     |
|------------|---------|--------------|-------------------------------------------------|
| record_id  | INTEGER | adimensional | Record ID as decimal number                     |
| site       | TEXT    | adimensional | Site name                                       |
| site_id    | INTEGER | adimensional | Site code as decimal number (01-99)             |
| species    | TEXT    | adimensional | Species name                                    |
| species_id | TEXT    | adimensional | Species text code                               |
| year       | INTEGER | YYYY         | Year with century as decimal number (0000-9999) |
| dbh1_cm    | REAL    | cm           | Diameter at breast height                       |
| height1_m  | REAL    | m            | Tree height                                     |
| size_m2    | REAL    | m2           | Plot size                                       |

**Table SOM8:** Description of STAND variables included in the database.

| variable                | type    | units        | description                                                                                                                                                                                                                                                        |
|-------------------------|---------|--------------|--------------------------------------------------------------------------------------------------------------------------------------------------------------------------------------------------------------------------------------------------------------------|
| record_id               | INTEGER | adimensional | Record ID as decimal number                                                                                                                                                                                                                                        |
| site                    | TEXT    | adimensional | Site name                                                                                                                                                                                                                                                          |
| site_id                 | INTEGER | adimensional | Site code as decimal number (01-99)                                                                                                                                                                                                                                |
| species                 | TEXT    | adimensional | Species name                                                                                                                                                                                                                                                       |
| species_id              | TEXT    | adimensional | Species text code                                                                                                                                                                                                                                                  |
| year                    | INTEGER | YYYY         | Year with century as decimal number (0000-9999)                                                                                                                                                                                                                    |
| aboveGroundBiomass_kgha | REAL    | kg ha-1      | Above ground biomass                                                                                                                                                                                                                                               |
| age                     | INTEGER | years        | Mean stand age                                                                                                                                                                                                                                                     |
| ba_m2ha                 | REAL    | m2 ha-1      | Basal area per hectare                                                                                                                                                                                                                                             |
| branchesBiomass_kgha    | REAL    | kg ha-1      | Branches biomass                                                                                                                                                                                                                                                   |
| dbhArith_cm             | REAL    | cm           | Arithmetic mean diameter                                                                                                                                                                                                                                           |
| dbhBA_cm                | REAL    | cm           | Average diameter weighted by basal area calculated as $dbhBA = (ba1*dbh1 + ba2*dbh2 + \dots + bak*dbhk) / (ba1 + ba2 + \dots + bak)$ , where bai and dbhi are the basal area and dbh, respectively, of the tree i, and $i = 1, 2, \dots, k$                        |
| dbhDQ_cm                | REAL    | cm           | Mean squared diameter or quadratic mean diameter calculated as $dbhDQ = \sqrt{(dbh1^2 + dbh2^2 + \dots + dbhk^2) / N}$ , where dbhi is the diameter at breast height of tree i, $i = 1, 2, \dots, k$ , N is the total number of trees, and sqrt is the square root |
| density_treeha          | REAL    | tree ha-1    | Number of tree per ha                                                                                                                                                                                                                                              |
| foliageBiomass_kgha     | REAL    | kg ha-1      | Foliage biomass                                                                                                                                                                                                                                                    |

|                             |      |              |                                                                                                                                                                                                                                                                                                                                                  |
|-----------------------------|------|--------------|--------------------------------------------------------------------------------------------------------------------------------------------------------------------------------------------------------------------------------------------------------------------------------------------------------------------------------------------------|
| heightArith_m               | REAL | m            | Arithmetic mean height                                                                                                                                                                                                                                                                                                                           |
| heightBA_m                  | REAL | m            | Average height weighted by basal area or Loreys height calculated as $\text{heightBA} = (\text{ba1} \cdot \text{h1} + \text{ba2} \cdot \text{h2} + \dots + \text{bak} \cdot \text{hk}) / (\text{ba1} + \text{ba2} + \dots + \text{bak})$ , where bai and hi are the basal area and height, respectively, of the tree i, and $i = 1, 2, \dots, k$ |
| lai                         | REAL | adimensional | Leaf Area Index                                                                                                                                                                                                                                                                                                                                  |
| rootBiomass_kgha            | REAL | kg ha-1      | Root biomass                                                                                                                                                                                                                                                                                                                                     |
| stemBiomass_kgha            | REAL | kg ha-1      | Stem biomass                                                                                                                                                                                                                                                                                                                                     |
| stumpCoarseRootBiomass_kgha | REAL | kg ha-1      | Stump and coarse roots biomass                                                                                                                                                                                                                                                                                                                   |



**Table SOM9:** Description of FLUX variables included in the database.

| variable                | type    | units           | description                                                                                                                                                                            |
|-------------------------|---------|-----------------|----------------------------------------------------------------------------------------------------------------------------------------------------------------------------------------|
| record_id               | INTEGER | adimensional    | Record ID as decimal number                                                                                                                                                            |
| site_id                 | INTEGER | adimensional    | Site code as decimal number (01-99)                                                                                                                                                    |
| date                    | TEXT    | adimensional    | Date in format YYYY-MM-DD hh:mm:ss. Derived from TIMESTAMP_START                                                                                                                       |
| year                    | INTEGER | YYYY            | Year with century as decimal number (0000-9999). Derived from TIMESTAMP_START                                                                                                          |
| mo                      | INTEGER | MM              | Month as decimal number (01-12). Derived from TIMESTAMP_START                                                                                                                          |
| day                     | INTEGER | DD              | Day of the month as decimal number (01-31). Derived from TIMESTAMP_START                                                                                                               |
| gppDtCutRef_umolCO2m2s1 | REAL    | umolCO2 m-2 s-1 | Gross Primary Production, from Daytime partitioning method, reference selected from GPP versions using a model efficiency approach. Based on corresponding NEE_CUT_XX version          |
| gppDtCutSe_umolCO2m2s1  | REAL    | umolCO2 m-2 s-1 | Standard Error for Gross Primary Production, calculated as $\text{stdev}(\text{gppDtCut\_XX}) / \sqrt{40}$ . SE from 40 half-hourly gppDtCut_XX                                        |
| gppDtVutRef_umolCO2m2s1 | REAL    | umolCO2 m-2 s-1 | Gross Primary Production, from Daytime partitioning method, reference version selected from GPP versions using a model efficiency approach. Based on corresponding neeVut_XX version   |
| gppDtVutSe_umolCO2m2s1  | REAL    | umolCO2 m-2 s-1 | Standard Error for Gross Primary Production, calculated as $\text{stdev}(\text{gppDtVut\_XX}) / \sqrt{40}$ . SE from 40 half-hourly gppDtVut_XX                                        |
| gppNtCutRef_umolCO2m2s1 | REAL    | umolCO2 m-2 s-1 | Gross Primary Production, from Nighttime partitioning method, reference selected from GPP versions using a model efficiency approach. Based on corresponding NEE_CUT_XX version        |
| gppNtCutSe_umolCO2m2s1  | REAL    | umolCO2 m-2 s-1 | Standard Error for Gross Primary Production, calculated as $\text{stdev}(\text{gppNtCut\_XX}) / \sqrt{40}$ . SE from 40 half-hourly gppNtCut_XX                                        |
| gppNtVutRef_umolCO2m2s1 | REAL    | umolCO2 m-2 s-1 | Gross Primary Production, from Nighttime partitioning method, reference version selected from GPP versions using a model efficiency approach. Based on corresponding neeVut_XX version |

|                               |         |                 |                                                                                                                                                                                                                             |
|-------------------------------|---------|-----------------|-----------------------------------------------------------------------------------------------------------------------------------------------------------------------------------------------------------------------------|
| gppNtVutSe_umolCO2m2s1        | REAL    | umolCO2 m-2 s-1 | Standard Error for Gross Primary Production, calculated as $(\text{stdev}(\text{gppNtVut\_XX}) / \sqrt{40})$ . SE from 40 half-hourly gppNtVut_XX                                                                           |
| neeCutRefJointunc_umolCO2m2s1 | REAL    | umolCO2 m-2 s-1 | Joint uncertainty estimation for neeCutRef, including random uncertainty and USTAR filtering uncertainty $[\sqrt{(\text{neeCutRef\_RANDUNC}^2 + ((\text{NEE\_CUT\_84} - \text{NEE\_CUT\_16}) / 2)^2)}$ ] for each half-hour |
| neeCutRef_qc                  | INTEGER | adimensional    | Quality flag for neeCutRef. 0 = measured; 1 = good quality gapfill; 2 = medium; 3 = poor.                                                                                                                                   |
| neeCutRef_umolCO2m2s1         | REAL    | umolCO2 m-2 s-1 | Net Ecosystem Exchange, using Constant Ustar Threshold (CUT) across years, reference selected on the basis of the model efficiency                                                                                          |
| neeVutRefJointunc_umolCO2m2s1 | REAL    | umolCO2 m-2 s-1 | Joint uncertainty estimation for neeVutRef, including random uncertainty and USTAR filtering uncertainty $[\sqrt{(\text{neeVutRef\_RANDUNC}^2 + ((\text{neeVut\_84} - \text{neeVut\_16}) / 2)^2)}$ ] for each half-hour     |
| neeVutRef_qc                  | INTEGER | adimensional    | Quality flag for neeVutRef. 0 = measured; 1 = good quality gapfill; 2 = medium; 3 = poor.                                                                                                                                   |
| neeVutRef_umolCO2m2s1         | REAL    | umolCO2 m-2 s-1 | Net Ecosystem Exchange, using Variable Ustar Threshold (VUT) for each year, reference selected on the basis of the model efficiency                                                                                         |
| recoDtCutRef_umolCO2m2s1      | REAL    | umolCO2 m-2 s-1 | Ecosystem Respiration, from Daytime partitioning method, reference selected from RECO versions using a model efficiency approach. Based on corresponding NEE_CUT_XX version                                                 |
| recoDtCutSe_umolCO2m2s1       | REAL    | umolCO2 m-2 s-1 | Standard Error for Ecosystem Respiration, calculated as $\text{stdev}(\text{recoDtCut\_XX}) / \sqrt{40}$ . SE from 40 half-hourly recoDtCut_XX                                                                              |
| recoDtVutRef_umolCO2m2s1      | REAL    | umolCO2 m-2 s-1 | Ecosystem Respiration, from Daytime partitioning method, reference selected from RECO versions using a model efficiency approach. Based on corresponding neeVut_XX version                                                  |
| recoDtVutSe_umolCO2m2s1       | REAL    | umolCO2 m-2 s-1 | Standard Error for Ecosystem Respiration, calculated as $\text{stdev}(\text{recoDtVut\_XX}) / \sqrt{40}$ . SE from 40 half-hourly recoDtCut_XX                                                                              |
| recoNtCutRef_umolCO2m2s1      | REAL    | umolCO2 m-2 s-1 | Ecosystem Respiration, from Nighttime partitioning method, reference selected from RECO versions using a model efficiency approach. Based on corresponding NEE_CUT_XX version                                               |
| recoNtCutSe_umolCO2m2s1       | REAL    | umolCO2 m-2 s-1 | Standard Error for Ecosystem Respiration, calculated as $\text{stdev}(\text{recoNtCut\_XX}) / \sqrt{40}$ . SE from 40 half-hourly recoNtCut_XX                                                                              |

|                          |      |                 |                                                                                                                                                                              |
|--------------------------|------|-----------------|------------------------------------------------------------------------------------------------------------------------------------------------------------------------------|
| recoNtVutRef_umolCO2m2s1 | REAL | umolCO2 m-2 s-1 | Ecosystem Respiration, from Nighttime partitioning method, reference selected from RECO versions using a model efficiency approach. Based on corresponding neeVut_XX version |
| recoNtVutSe_umolCO2m2s1  | REAL | umolCO2 m-2 s-1 | Standard Error for Ecosystem Respiration, calculated as $\text{stdev}(\text{recoNtVut\_XX}) / \text{sqrt}(40)$ . SE from 40 half-hourly recoNtCut_XX                         |
| timestampEnd             | TEXT | YYYYMMDDHHMM    | ISO timestamp end of averaging period - short format                                                                                                                         |
| timestampStart           | TEXT | YYYYMMDDHHMM    | ISO timestamp start of averaging period - short format                                                                                                                       |

**Table SOM10:** Description of MODIS variables included in the database.

| variable  | type    | units        | description                                                                     | comments                                                                                                                                                                                                                                                                                                                                                                                                                                                                                                                        | source  |
|-----------|---------|--------------|---------------------------------------------------------------------------------|---------------------------------------------------------------------------------------------------------------------------------------------------------------------------------------------------------------------------------------------------------------------------------------------------------------------------------------------------------------------------------------------------------------------------------------------------------------------------------------------------------------------------------|---------|
| record_id | INTEGER | adimensional | Record ID as decimal number                                                     |                                                                                                                                                                                                                                                                                                                                                                                                                                                                                                                                 |         |
| site      | TEXT    | adimensional | Site name                                                                       |                                                                                                                                                                                                                                                                                                                                                                                                                                                                                                                                 |         |
| site_id   | INTEGER | adimensional | Site code as decimal number (01-99)                                             |                                                                                                                                                                                                                                                                                                                                                                                                                                                                                                                                 |         |
| date      | TEXT    | adimensional | Date in format YYYY-MM-DD                                                       |                                                                                                                                                                                                                                                                                                                                                                                                                                                                                                                                 |         |
| year      | INTEGER | YYYY         | Year with century as decimal number (0000-9999)                                 |                                                                                                                                                                                                                                                                                                                                                                                                                                                                                                                                 |         |
| mo        | INTEGER | MM           | Month as decimal number (01-12)                                                 |                                                                                                                                                                                                                                                                                                                                                                                                                                                                                                                                 |         |
| day       | INTEGER | DD           | Day of the month as decimal number (01-31)                                      |                                                                                                                                                                                                                                                                                                                                                                                                                                                                                                                                 |         |
| aB01_rad  | REAL    | radian       | Angle in red. Spatial resolution: 0.5 km. Temporal resolution: 8-day composite. | Calculated from MOD09A1 after Khanna, S., A. Palacios-Orueta, M. L. Whiting, S. L. Ustin, D. R. no, and J. Litago, 2007. Development of angle indexes for soil moisture estimation, dry matter detection and land-cover discrimination. Remote Sensing of Environment 109:154 – 165. Note: The observations with values larger than (average + 1standard deviation) or smaller than (average – 1standard deviation) in a window size of 5 observations have been filtered and substituted with the average value of the window. | MOD09A1 |
| aB02_rad  | REAL    | radian       | Angle in near infrared. Calculated with MOD09A1. Spatial resolution 0.5 km      | Calculated from MOD09A1 after Palacios-Orueta, A., M. Huesca, M. L. Whiting, J. Litago, S. Khanna, M. Garcia, and S. L. Ustin, 2012. Derivation of phenological metrics by function fitting to time-series of spectral shape indexes AS1 and AS2: Mapping cotton phenological stages using modis time series.                                                                                                                                                                                                                   | MOD09A1 |

|          |      |        |                                                                                       |                                                                                                                                                                                                                                                                                                                                                                                                                                                                                                                                                                                                       |         |
|----------|------|--------|---------------------------------------------------------------------------------------|-------------------------------------------------------------------------------------------------------------------------------------------------------------------------------------------------------------------------------------------------------------------------------------------------------------------------------------------------------------------------------------------------------------------------------------------------------------------------------------------------------------------------------------------------------------------------------------------------------|---------|
|          |      |        |                                                                                       | Remote Sensing of Environment 12:148–159.<br>Note: The observations with values larger than (average + 1standard deviation) or smaller than (average – 1standard deviation) in a window size of 5 observations have been filtered and substituted with the average value of the window.                                                                                                                                                                                                                                                                                                               |         |
| aB05_rad | REAL | radian | Angle in SWIR 1.Spatial resolution: 0.5 km.<br>Temporal resolution: 8-day composite.  | Calculated from MOD09A1 after Palacios-Orueta, A., M. Huesca, M. L. Whiting, J. Litago, S. Khanna, M. Garcia, and S. L. Ustin, 2012. Derivation of phenological metrics by function fitting to time-series of spectral shape indexes AS1 and AS2: Mapping cotton phenological stages using modis time series. Remote Sensing of Environment 12:148–159.<br>Note: The observations with values larger than (average + 1standard deviation) or smaller than (average – 1standard deviation) in a window size of 5 observations have been filtered and substituted with the average value of the window. | MOD09A1 |
| aB06_rad | REAL | radian | Angle in SWIR 2. Spatial resolution: 0.5 km.<br>Temporal resolution: 8-day composite. | Calculated from MOD09A1 after Palacios-Orueta, A., M. Huesca, M. L. Whiting, J. Litago, S. Khanna, M. Garcia, and S. L. Ustin, 2012. Derivation of phenological metrics by function fitting to time-series of spectral shape indexes AS1 and AS2: Mapping cotton phenological stages using modis time series. Remote Sensing of Environment 12:148–159.<br>Note: The observations with values larger than (average + 1standard deviation) or smaller than (average – 1standard deviation)                                                                                                             | MOD09A1 |

|           |         |              |                                                                                                                                                                                                                                                                                                                                                                                                                                                                 |                                                                                                                                         |         |
|-----------|---------|--------------|-----------------------------------------------------------------------------------------------------------------------------------------------------------------------------------------------------------------------------------------------------------------------------------------------------------------------------------------------------------------------------------------------------------------------------------------------------------------|-----------------------------------------------------------------------------------------------------------------------------------------|---------|
|           |         |              |                                                                                                                                                                                                                                                                                                                                                                                                                                                                 | in a window size of 5 observations have been filtered and substituted with the average value of the window.                             |         |
| evi16     | REAL    | adimensional | Enhanced Vegetation Index. Valid range: -0.2 - 1. Fill value: NA. Spatial resolution: 250 meters. Temporal resolution: 16-day composite.                                                                                                                                                                                                                                                                                                                        | Data are provided every 16 days at 250-meter spatial resolution. Each value corresponds to the best observation during a 16 day period. | MOD13Q1 |
| evi16_qc  | REAL    | adimensional | Indicates the level of the product quality that is classified as follows: 0 = good quality, index produced; 2 = other quality, index produced, but check other qc and index produced, but most probably cloudy; 3 = index not produced due to other reasons than cloud, thus fill values were substituted by an interpolated values when the previous and the following values were available<br>$\text{index} = (\text{index}_{t-1} + \text{index}_{t+1})/2$ . |                                                                                                                                         | MOD13Q1 |
| evi8      | REAL    | adimensional | Enhance Vegetation Index. Spatial resolution: 0.5 km. Temporal resolution: 8-day composite                                                                                                                                                                                                                                                                                                                                                                      |                                                                                                                                         | MOD09A1 |
| fpar      | REAL    | adimensional | Proportion of available radiation in the photosynthetically active wavelengths. Valid range: 0 - 1. Fill value: NA. Spatial resolution: 1 km. Temporal resolution: 8-day composite.                                                                                                                                                                                                                                                                             |                                                                                                                                         | MOD15A2 |
| fpar_qc   | INTEGER | adimensional | Indicates the level of the product quality that is classified as follows: 0 = Good quality (main algorithm with or without saturation); 2 = Other quality (back-up algorithm or fill values)                                                                                                                                                                                                                                                                    |                                                                                                                                         | MOD15A2 |
| gpp_gCm2d | REAL    | gC m-2 d-1   | Gross Primary Production. Valid range: -375 – 375. Fill value: NA. Spatial resolution 1 km. Temporal resolution: 8-day accumulation.                                                                                                                                                                                                                                                                                                                            | This has been calculated by dividing each 8-day values by 8 for the first 45 values/year and by 5 or 6 for the final period.            | MOD17A2 |
| gpp_qc    | INTEGER | adimensional | Indicates the level of the product quality that is classified as follows: 0 = good quality, the estimates were done using the main algorithm                                                                                                                                                                                                                                                                                                                    |                                                                                                                                         | MOD17A2 |

|               |         |               |                                                                                                                                                                                              |                                                                                                                                                                                                                                                                                                                                                                                                                                                                               |         |
|---------------|---------|---------------|----------------------------------------------------------------------------------------------------------------------------------------------------------------------------------------------|-------------------------------------------------------------------------------------------------------------------------------------------------------------------------------------------------------------------------------------------------------------------------------------------------------------------------------------------------------------------------------------------------------------------------------------------------------------------------------|---------|
|               |         |               | with or without saturation; 2 = other quality, the estimates were done using back-up algorithm.                                                                                              |                                                                                                                                                                                                                                                                                                                                                                                                                                                                               |         |
| lai           | REAL    | adimensional  | Leaf area index. Valid range: 0 - 10. Fill value: NA. Spatial resolution: 1 km. Temporal resolution: 8-day composite.                                                                        |                                                                                                                                                                                                                                                                                                                                                                                                                                                                               | MOD15A2 |
| lai_qc        | INTEGER | adimensional  | Indicates the level of the product quality that is classified as follows: 0 = Good quality (main algorithm with or without saturation); 2 = Other quality (back-up algorithm or fill values) |                                                                                                                                                                                                                                                                                                                                                                                                                                                                               | MOD15A2 |
| lstDay_degK   | REAL    | degree Kelvin | Daytime land surface temperature. Valid range: 150 – 1310.7. Fill value: NA. Spatial resolution: 1 km. Temporal resolution: 8-day composite.                                                 | The level-3 MODIS global Land Surface Temperature (LST) and Emissivity 8-day data are composed from the daily 1-kilometer LST product (MOD11A1) the average values of clear-sky LSTs during an 8-day period. In this data set the daytime and nighttime LSTs, are provided. Products are validated to Stage 2, which means that their accuracy has been assessed over a widely distributed set of locations and time periods via several ground-truth and validation efforts. | MOD11A2 |
| lstDay_qc     | INTEGER | adimensional  | Indicates the level of quality of the product that is classified as follows: 0 = good quality; 2 = other quality; 3 = interpolated, 4 = pixel not produced (NA)                              |                                                                                                                                                                                                                                                                                                                                                                                                                                                                               | MOD11A2 |
| lstNight_degK | REAL    | degree Kelvin | Nighttime land surface temperature. Valid range: 150 – 1310.7. Fill value: NA. Spatial resolution: 1 km. Temporal resolution: 8-day composite.                                               | The level-3 MODIS global Land Surface Temperature (LST) and Emissivity 8-day data are composed from the daily 1-kilometer LST product (MOD11A1) the average values of clear-sky LSTs during an 8-day period. In this data set the daytime and nighttime LSTs, are provided. Products are validated to Stage 2,                                                                                                                                                                | MOD11A2 |

|             |         |              |                                                                                                                                                                                                                                                                                                                                                                                                                                                                 |                                                                                                                                                                                                                                                                                                                                                                                                                      |         |
|-------------|---------|--------------|-----------------------------------------------------------------------------------------------------------------------------------------------------------------------------------------------------------------------------------------------------------------------------------------------------------------------------------------------------------------------------------------------------------------------------------------------------------------|----------------------------------------------------------------------------------------------------------------------------------------------------------------------------------------------------------------------------------------------------------------------------------------------------------------------------------------------------------------------------------------------------------------------|---------|
|             |         |              |                                                                                                                                                                                                                                                                                                                                                                                                                                                                 | which means that their accuracy has been assessed over a widely distributed set of locations and time periods via several ground-truth and validation efforts.                                                                                                                                                                                                                                                       |         |
| 1stNight_qc | INTEGER | adimensional | Indicates the level of quality of the product that is classified as follows: 0 = good quality; 2 = other quality; 3 = interpolated, 4 = pixel not produced (NA)                                                                                                                                                                                                                                                                                                 |                                                                                                                                                                                                                                                                                                                                                                                                                      | MOD11A2 |
| ndvi16      | REAL    | adimensional | Normalized Difference Vegetation Index. Valid range: -0.2 - 1. Fill value: NA. Spatial resolution: 250 meters. Temporal resolution: 16-day composite.                                                                                                                                                                                                                                                                                                           | Data are provided every 16 days at 250-meter spatial resolution. Each value corresponds to the best observation during a 16 day period.                                                                                                                                                                                                                                                                              | MOD13Q1 |
| ndvi16_qc   | REAL    | adimensional | Indicates the level of the product quality that is classified as follows: 0 = good quality, index produced; 2 = other quality, index produced, but check other qc and index produced, but most probably cloudy; 3 = index not produced due to other reasons than cloud, thus fill values were substituted by an interpolated values when the previous and the following values were available<br>$\text{index} = (\text{index}_{t-1} + \text{index}_{t+1})/2$ . |                                                                                                                                                                                                                                                                                                                                                                                                                      | MOD13Q1 |
| ndvi8       | REAL    | adimensional | Normalized Difference Vegetation Index. Spatial resolution: 0.5 km. Temporal resolution: 8-day composite                                                                                                                                                                                                                                                                                                                                                        | Calculated from MOD09A1 after Tucker, C.J., 1979. Red and photographic infrared linear combinations for monitoring vegetation. Remote Sensing of Environment. 8, 127–150. Note: The observations with values larger than (average + 1standard deviation) or smaller than (average – 1standard deviation) in a window size of 5 observations have been filtered and substituted with the average value of the window. | MOD09A1 |



|             |         |              |                                                                                                                                                                                                                                                                                                                                                                                                                                                                                                                                                                                           |                                                                                                                                                                                                                                                                                                                                                                                                                                        |         |
|-------------|---------|--------------|-------------------------------------------------------------------------------------------------------------------------------------------------------------------------------------------------------------------------------------------------------------------------------------------------------------------------------------------------------------------------------------------------------------------------------------------------------------------------------------------------------------------------------------------------------------------------------------------|----------------------------------------------------------------------------------------------------------------------------------------------------------------------------------------------------------------------------------------------------------------------------------------------------------------------------------------------------------------------------------------------------------------------------------------|---------|
| ndwi        | REAL    | adimensional | Normalized Difference Water Index. Spatial resolution: 0.5 km. Temporal resolution: 8-day composite                                                                                                                                                                                                                                                                                                                                                                                                                                                                                       | Calculated from MOD09A1 after Gao, B., 1996. NDWI—a normalized difference water index for remote sensing of vegetation liquid water from space. Remote Sensing of Environment. 58, 257–266. Note: The observations with values larger than (average + 1standard deviation) or smaller than (average – 1standard deviation) in a window size of 5 observations have been filtered and substituted with the average value of the window. | MOD09A1 |
| psNet_gCm2d | REAL    | gC m-2 d-1   | Net Photosynthesis (GPP – maintenance respiration). Valid range: -375 – 375. Fill value: NA. Spatial resolution 1 km. Temporal resolution: 8-day accumulation.                                                                                                                                                                                                                                                                                                                                                                                                                            | This has been calculated by dividing each 8-day values by 8 for the first 45 values/year and by 5 or 6 for the final period.                                                                                                                                                                                                                                                                                                           | MOD17A2 |
| psNet_qc    | INTEGER | adimensional | Indicates the level of the product quality that is classified as follows: 0 = good quality, the estimates were done using the main algorithm with or without saturation; 2 = other quality, the estimates were done using back-up algorithm.                                                                                                                                                                                                                                                                                                                                              |                                                                                                                                                                                                                                                                                                                                                                                                                                        | MOD17A2 |
| refl_qc     | INTEGER | adimensional | Indicates the level of quality correction of the product (the seven bands) that is classified as follows: 0 = Highest quality, corrected product produced at ideal quality all bands; 2 = corrected product produced at less than ideal quality some or all bands, some bands could not be completely correct; 3 = interpolated, when corrected product has not been produced in one or some bands and they have been interpolated with the value $R_t = (R_{t-1} + R_{t+1})/2$ ; 4 = corrected product not produced, when product has not been completely corrected in one or some bands |                                                                                                                                                                                                                                                                                                                                                                                                                                        | MOD09A1 |

|                 |      |                     |                                                                                                                                                                                                                                           |                                                                                                                                 |         |
|-----------------|------|---------------------|-------------------------------------------------------------------------------------------------------------------------------------------------------------------------------------------------------------------------------------------|---------------------------------------------------------------------------------------------------------------------------------|---------|
|                 |      |                     | and could not be interpolated. Data may be wrong or filled with NA; 5 = Missing data, indicates that the product was not available for that date. Some of them correspond to specific continuous periods. All the columns filled with NA. |                                                                                                                                 |         |
| reflB01_percent | REAL | percent reflectance | Surface Reflectance Band 1 (620–670 nm) Red. Fill value: NA. Spatial resolution: 0.5 km. Temporal resolution: 8-day composite.                                                                                                            |                                                                                                                                 | MOD09A1 |
| reflB02_percent | REAL | percent reflectance | Surface Reflectance Band 2 (841–876 nm) NIR. Fill value: NA. Spatial resolution: 0.5 km. Temporal resolution: 8-day composite.                                                                                                            |                                                                                                                                 | MOD09A1 |
| reflB03_percent | REAL | percent reflectance | Surface Reflectance Band 3 (459–479 nm) Blue. Fill value: NA. Spatial resolution: 0.5 km. Temporal resolution: 8-day composite.                                                                                                           |                                                                                                                                 | MOD09A1 |
| reflB04_percent | REAL | percent reflectance | Surface Reflectance Band 4 (545–565 nm) Green. Fill value: NA. Spatial resolution: 0.5 km. Temporal resolution: 8-day composite.                                                                                                          |                                                                                                                                 | MOD09A1 |
| reflB05_percent | REAL | percent reflectance | Surface Reflectance Band 5 (1230–1250 nm) SWIR1. Fill value: NA. Spatial resolution: 0.5 km. Temporal resolution: 8-day composite.                                                                                                        |                                                                                                                                 | MOD09A1 |
| reflB06_percent | REAL | percent reflectance | Surface Reflectance Band 6 (1628–1652 nm) SWIR2. Fill value: NA. Spatial resolution: 0.5 km. Temporal resolution: 8-day composite.                                                                                                        |                                                                                                                                 | MOD09A1 |
| reflB07_percent | REAL | percent reflectance | Surface Reflectance Band 7 (2105–2155 nm) SWIR3. Fill value: NA. Spatial resolution: 0.5 km. Temporal resolution: 8-day composite.                                                                                                        |                                                                                                                                 | MOD09A1 |
| sani_rad        | REAL | radian              | Shortwave Angle Normalized Index. Valid range: -3.14 - 3.14. Spatial resolution: 0.5 km. Temporal resolution: 8-day composite.                                                                                                            | Calculated from MOD09A1 after Palacios-Orueta, A., Khanna, S., Litago, J., Whiting, M.L., Ustin, S.L., 2006. Assessment of NDVI | MOD09A1 |

|          |      |        |                                                                                               |                                                                                                                                                                                                                                                                                                                                                                                                                                                                                                                                                                            |         |
|----------|------|--------|-----------------------------------------------------------------------------------------------|----------------------------------------------------------------------------------------------------------------------------------------------------------------------------------------------------------------------------------------------------------------------------------------------------------------------------------------------------------------------------------------------------------------------------------------------------------------------------------------------------------------------------------------------------------------------------|---------|
|          |      |        |                                                                                               | and NDWI spectral indices using MODIS time series analysis and development of a new spectral index based on MODIS shortwave infrared bands. 1st International Conference on Remote Sensing and Geoinformation Processing in the Assessment and Monitoring of Land Degradation and Desertification, Trier, Germany, pp. 207–209. Note: The observations with values larger than (average + 1standard deviation) or smaller than (average – 1standard deviation) in a window size of 5 observations have been filtered and substituted with the average value of the window. |         |
| sasi_rad | REAL | radian | Shortwave Angle Slope Index. Spatial resolution: 0.5 km. Temporal resolution: 8-day composite | Calculated from MOD09A1 after Khanna, S., A. Palacios-Orueta, M. L. Whiting, S. L. Ustin, D. R. no, and J. Litago, 2007. Development of angle indexes for soil moisture estimation, dry matter detection and land-cover discrimination. Remote Sensing of Environment 109:154 – 165. Note: The observations with values larger than (average + 1standard deviation) or smaller than (average – 1standard deviation) in a window size of 5 observations have been filtered and substituted with the average value of the window.                                            | MOD09A1 |

**Table SOM11:** Description of CLIMATE\_LOCAL quality variables from FLUXNET included in the database.

| variable    | type | units        | description                                                                                                                      |
|-------------|------|--------------|----------------------------------------------------------------------------------------------------------------------------------|
| site        | TEXT | adimensional | Site name                                                                                                                        |
| airpress_qc | REAL | adimensional | fraction between 0-1; indicating percentage of measured and good quality gapfill half-hourly data used to create the daily value |
| p_qc        | REAL | adimensional | fraction between 0-1; indicating percentage of measured and good quality gapfill half-hourly data used to create the daily value |
| rad_qc      | REAL | adimensional | fraction between 0-1; indicating percentage of measured and good quality gapfill half-hourly data used to create the daily value |
| relhum_qc   | REAL | adimensional | fraction between 0-1; indicating percentage of measured and good quality gapfill half-hourly data used to create the daily value |
| tmax_qc     | REAL | adimensional | fraction between 0-1; indicating percentage of measured and good quality gapfill half-hourly data used to create the daily value |
| tmean_qc    | REAL | adimensional | fraction between 0-1; indicating percentage of measured and good quality gapfill half-hourly data used to create the daily value |
| tmin_qc     | REAL | adimensional | fraction between 0-1; indicating percentage of measured and good quality gapfill half-hourly data used to create the daily value |
| wind_qc     | REAL | adimensional | fraction between 0-1; indicating percentage of measured and good quality gapfill half-hourly data used to create the daily value |

**Table SOM12:** Description of ATMOSPHERIC\_HEAT\_CONDUCTANCE variables included in the database.

| variable           | type    | units        | description                                                                                 |
|--------------------|---------|--------------|---------------------------------------------------------------------------------------------|
| record_id          | INTEGER | adimensional | Record ID as decimal number                                                                 |
| site_id            | INTEGER | adimensional | Site code as decimal number (01-99)                                                         |
| date               | TEXT    | adimensional | Date in format YYYY-MM-DD hh:mm:ss. Derived from TIMESTAMP_START                            |
| year               | INTEGER | YYYY         | Year with century as decimal number (0000-9999). Derived from TIMESTAMP_START               |
| mo                 | INTEGER | MM           | Month as decimal number (01-12). Derived from TIMESTAMP_START                               |
| day                | INTEGER | DD           | Day of the month as decimal number (01-31). Derived from TIMESTAMP_START                    |
| hCORRJOINTUNC_Wm2  | REAL    | W m-2        | Joint uncertainty estimation for h as $\sqrt{hRANDUNC^2 + ((hCORR75 - hCORR25) / 1.349)^2}$ |
| hCORR_Wm2          | REAL    | W m-2        | Sensible heat flux, corrected hFMDS by energy balance closure correction factor             |
| hFMDS_Wm2          | REAL    | W m-2        | Sensible heat flux, gapfilled using MDS method                                              |
| hFMDS_qc           | INTEGER | adimensional | Quality flag for hCORR. 0 = measured; 1 = good quality gapfill; 2 = medium; 3 = poor.       |
| leCORRJOINTUNC_Wm2 | REAL    | W m-2        | Joint uncertainty estimation for le                                                         |
| leCORR_Wm2         | REAL    | W m-2        | Latent heat flux, corrected le_FMDS by energy balance closure correction factor             |
| leFMDS_Wm2         | REAL    | W m-2        | Latent heat flux, gapfilled using MDS method                                                |
| leFMDS_qc          | INTEGER | adimensional | Quality flag for leCORR. 0 = measured; 1 = good quality gapfill; 2 = medium; 3 = poor.      |
| timestampEnd       | TEXT    | YYYYMMDDHHMM | ISO timestamp end of averaging period - short format                                        |

|                |      |              |                                                        |
|----------------|------|--------------|--------------------------------------------------------|
| timestampStart | TEXT | YYYYMMDDHHMM | ISO timestamp start of averaging period - short format |
|----------------|------|--------------|--------------------------------------------------------|

**Table SOM13:** Description of SOILTS variables included in the database.

| variable          | type    | units        | description                                                                                             |
|-------------------|---------|--------------|---------------------------------------------------------------------------------------------------------|
| record_id         | INTEGER | adimensional | Record ID as decimal number                                                                             |
| site_id           | INTEGER | adimensional | Site code as decimal number (01-99)                                                                     |
| date              | TEXT    | adimensional | Date in format YYYY-MM-DD hh:mm:ss. Derived from TIMESTAMP_START                                        |
| year              | INTEGER | YYYY         | Year with century as decimal number (0000-9999). Derived from TIMESTAMP_START                           |
| mo                | INTEGER | MM           | Month as decimal number (01-12). Derived from TIMESTAMP_START                                           |
| day               | INTEGER | DD           | Day of the month as decimal number (01-31). Derived from TIMESTAMP_START                                |
| timestampEnd      | TEXT    | YYYYMMDDHHMM | ISO timestamp end of averaging period - short format                                                    |
| timestampStart    | TEXT    | YYYYMMDDHHMM | ISO timestamp start of averaging period - short format                                                  |
| swcFMDS1_deg<br>C | REAL    | percent      | Soil water content, gapfilled with MDS (numeric index \"#\ " increases with the depth, 1 is shallowest) |
| swcFMDS1_qc       | INTEGER | adimensional | Quality flag for tsFMDS#. 0 = measured; 1 = good quality gapfill; 2 = medium; 3 = poor.                 |
| swcFMDS2_deg<br>C | REAL    | percent      | Soil water content, gapfilled with MDS (numeric index \"#\ " increases with the depth, 1 is shallowest) |
| swcFMDS2_qc       | INTEGER | adimensional | Quality flag for tsFMDS#. 0 = measured; 1 = good quality gapfill; 2 = medium; 3 = poor.                 |
| swcFMDS3_deg<br>C | REAL    | percent      | Soil water content, gapfilled with MDS (numeric index \"#\ " increases with the depth, 1 is shallowest) |
| swcFMDS3_qc       | INTEGER | adimensional | Quality flag for tsFMDS#. 0 = measured; 1 = good quality gapfill; 2 = medium; 3 = poor.                 |
| swcFMDS4_deg<br>C | REAL    | percent      | Soil water content, gapfilled with MDS (numeric index \"#\ " increases with the depth, 1 is shallowest) |
| swcFMDS4_qc       | INTEGER | adimensional | Quality flag for tsFMDS#. 0 = measured; 1 = good quality gapfill; 2 = medium; 3 = poor.                 |
| swcFMDS5_deg<br>C | REAL    | percent      | Soil water content, gapfilled with MDS (numeric index \"#\ " increases with the depth, 1 is shallowest) |

|              |         |                |                                                                                                      |
|--------------|---------|----------------|------------------------------------------------------------------------------------------------------|
| swcFMDS5_qc  | INTEGER | adimensional   | Quality flag for tsFMDS#. 0 = measured; 1 = good quality gapfill; 2 = medium; 3 = poor.              |
| tsFMDS1_degC | REAL    | degree Celsius | Soil temperature, gapfilled with MDS (numeric index \"#\" increases with the depth, 1 is shallowest) |
| tsFMDS1_qc   | INTEGER | adimensional   | Quality flag for tsFMDS#. 0 = measured; 1 = good quality gapfill; 2 = medium; 3 = poor.              |
| tsFMDS2_degC | REAL    | degree Celsius | Soil temperature, gapfilled with MDS (numeric index \"#\" increases with the depth, 1 is shallowest) |
| tsFMDS2_qc   | INTEGER | adimensional   | Quality flag for tsFMDS#. 0 = measured; 1 = good quality gapfill; 2 = medium; 3 = poor.              |
| tsFMDS3_degC | REAL    | degree Celsius | Soil temperature, gapfilled with MDS (numeric index \"#\" increases with the depth, 1 is shallowest) |
| tsFMDS3_qc   | INTEGER | adimensional   | Quality flag for tsFMDS#. 0 = measured; 1 = good quality gapfill; 2 = medium; 3 = poor.              |
| tsFMDS4_degC | REAL    | degree Celsius | Soil temperature, gapfilled with MDS (numeric index \"#\" increases with the depth, 1 is shallowest) |
| tsFMDS4_qc   | INTEGER | adimensional   | Quality flag for tsFMDS#. 0 = measured; 1 = good quality gapfill; 2 = medium; 3 = poor.              |
| tsFMDS5_degC | REAL    | degree Celsius | Soil temperature, gapfilled with MDS (numeric index \"#\" increases with the depth, 1 is shallowest) |
| tsFMDS5_qc   | INTEGER | adimensional   | Quality flag for tsFMDS#. 0 = measured; 1 = good quality gapfill; 2 = medium; 3 = poor.              |



## Text SOM 1 Reconstruction of the stand development at Sorø (SOR-DK)

The objective of this section is to describe how we reconstructed the stand development from the available data (Table SOM14), where exact data on thinning were not available. Therefore we used the yield table to fill the missing information assuming that management at the site was following the general recommendations for this site (Møller 1933). Because of considerable differences in tree densities, we needed to scale the management cycle of Møller (1933) to the empirical data from our stand. We used mainly Møller's thinning schedule, i.e. at which age the stand was usually thinned. For this we reconstructed the stand backward, i.e. starting at 288 trees ha<sup>-1</sup> at age 90 yr in 2010 until 1921. This tree density ( $r$ ), i.e. numbers of trees per ha, was increased in years when the schedule ( $S$ ) is one, i.e. forcing a thinning event. The degree of thinning is described by the two right hand side terms as a root function depending on the tree density itself. This procedure forced the fitting procedure to stay closely to the measured data at the end of the stand development. The fitted values for the empirical parameters  $a$  and  $c$  were  $0.04128 \pm 0.01551$  ( $p=0.044755$  \*) and  $-1.19594 \pm 0.13255$  ( $p=0.000279$  \*\*\*), respectively. The results are displayed in Figure SOM2. Comparison with data after Møller's yield table shows that the reduction of tree density started earlier at Sorø than in the normal stand development. One probable reason for this is that the beech forest at Sorø was initiated underneath a canopy of a few remaining old beeches. This could have fostered more intensive self-thinning than under normal conditions. On the other hand the assumed initial number of beech trees of 6000 per ha is an overestimation. The tree density values in the first 20 years are very uncertain. On the other hand we are confident that the thinning scheme of Møller has been adopted by the Danish forestry management at least over a large part of the stand lifetime.

**Table SOM14:** New version on Management Information available

| Year/Periods | Tree density<br>[ha <sup>-1</sup> ] | Source                                        | Method                                 |
|--------------|-------------------------------------|-----------------------------------------------|----------------------------------------|
| 1921-1930    | 6000                                | Møller (1933) + Th Kaspersens notes (assumed) | from yield table + notes from forester |
| 1933         | 3550                                | from Munds Målebog                            | assumed measured in 468 m <sup>2</sup> |
| 1944         | 968                                 | Taksationsbog                                 | From volume and average DBH and height |
| 1977         | 384                                 | Estimated by Sorø Akademi                     | from yield table                       |
| 1992         | 369                                 | Estimated by Sorø Akademi                     | from yield table                       |

|                 |       |                               |                  |
|-----------------|-------|-------------------------------|------------------|
| 1995            | 361   | Estimated by Sorø Akademi     | from yield table |
| 2005 (03. 2006) | 326.3 | DTU measurements (P87)        | measured         |
| 2007            | 288   | DTU measurements (P87)[ANIB1] | measured         |

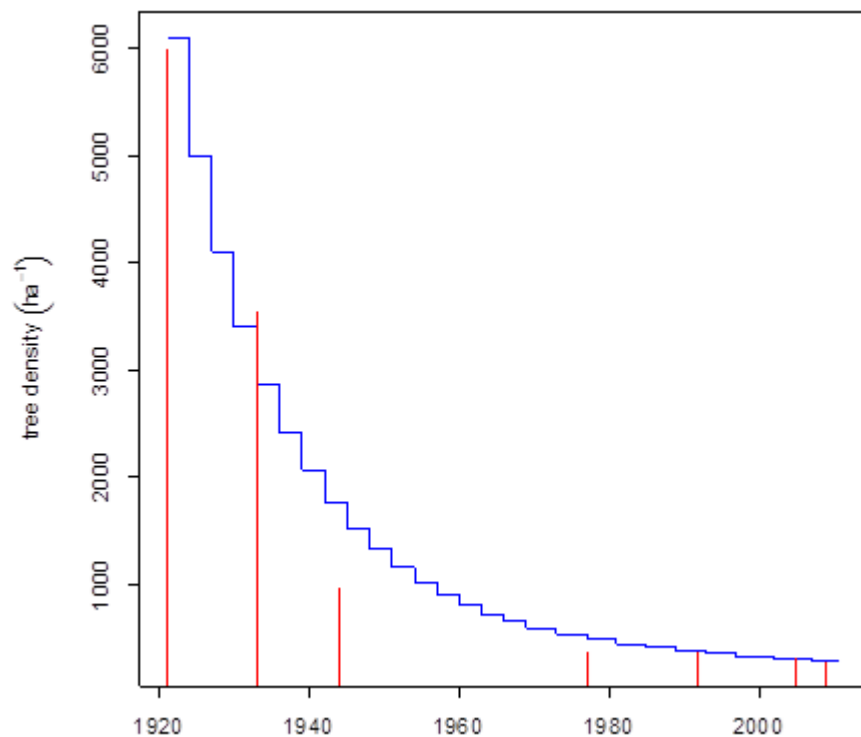

**Figure SOM2.** Reconstruction of the tree density at Sorø, division 335. During the years from 1921 to, at least, 1944 there was a canopy of old trees. The blue step function is the reconstructed series using the thinning intervals as in Møller (1933) and thinning intensities that match the observations best (red bars, see Table SOM14).

## Thinning

Unfortunately thinning of the trees is not anymore documented. Anders Grube, the current forest manager, explained the rule for thinning, which will be applied from now (= 2007 +) on, is thinning interval = tree age / 10 in years. This rule of thumb indicates a slight change from Møller's suggestion, i.e. thinning every 5 years at this stand age. Only a very few examples on how much wood volume was actually thinned can be found. In one example, 2007, thinning was performed in division 336 (planted in 1941, i.e. 66 years) the standing stock was 999 m<sup>3</sup> and he removed 40 m<sup>3</sup>, which is  $999/4.11 = 243 \text{ m}^3 \text{ ha}^{-1}$  and  $40/4.11 = 10 \text{ m}^3 \text{ ha}^{-1}$  for standing stock and harvested wood, respectively. This means from this particular site a relative extraction of 4 %. This is smaller than Møller's suggestion (ca. 11 %, for this age, Møller (1933)). Measurements of tree growth as part of contemporary forest planning (by Klaus Wunsch (KW-plan, c/o) are only performed on some divisions, none of them in the fetch of the tower. For this reason we decided to use the available data from the forest owner, Sorø Akademi (Table SOM14), and use yield table information and tree rings to reconstruct thinning events and the stand development. We concentrate on division 335 where the inventory, ecological and meteorological measurements have been taken. With this approach it is not possible to reconstruct the exact thinning activity in a certain year, but instead the general forest development is being reconstructed. The thinning events are only accurate within a 3-5 years period.

## References

Møller, C. M. (1933). "Bonitetstabeller og bonitetsvise tilvækstoversigter for bog, eg og rødgran i Danmark." Dansk Skovforenings Tidsskrift **18**: 457 - 513, 537 - 623.
